# Supplementary material for: Evaluation of the bioactivity of a mastoparan peptide from wasp venom and of its analogues designed through targeted engineering
Source: PubMed Central journal article supplement — Int J Biol Sci. 2018 Apr 25;14(6):599–607. doi: 10.7150/ijbs.23419 (PMC6001651; doi:10.7150/ijbs.23419), 2018-04-25
Supplement: ijbsv14p0599s1.pdf [file ijbsv14p0599s1.pdf]

## Supplement Data

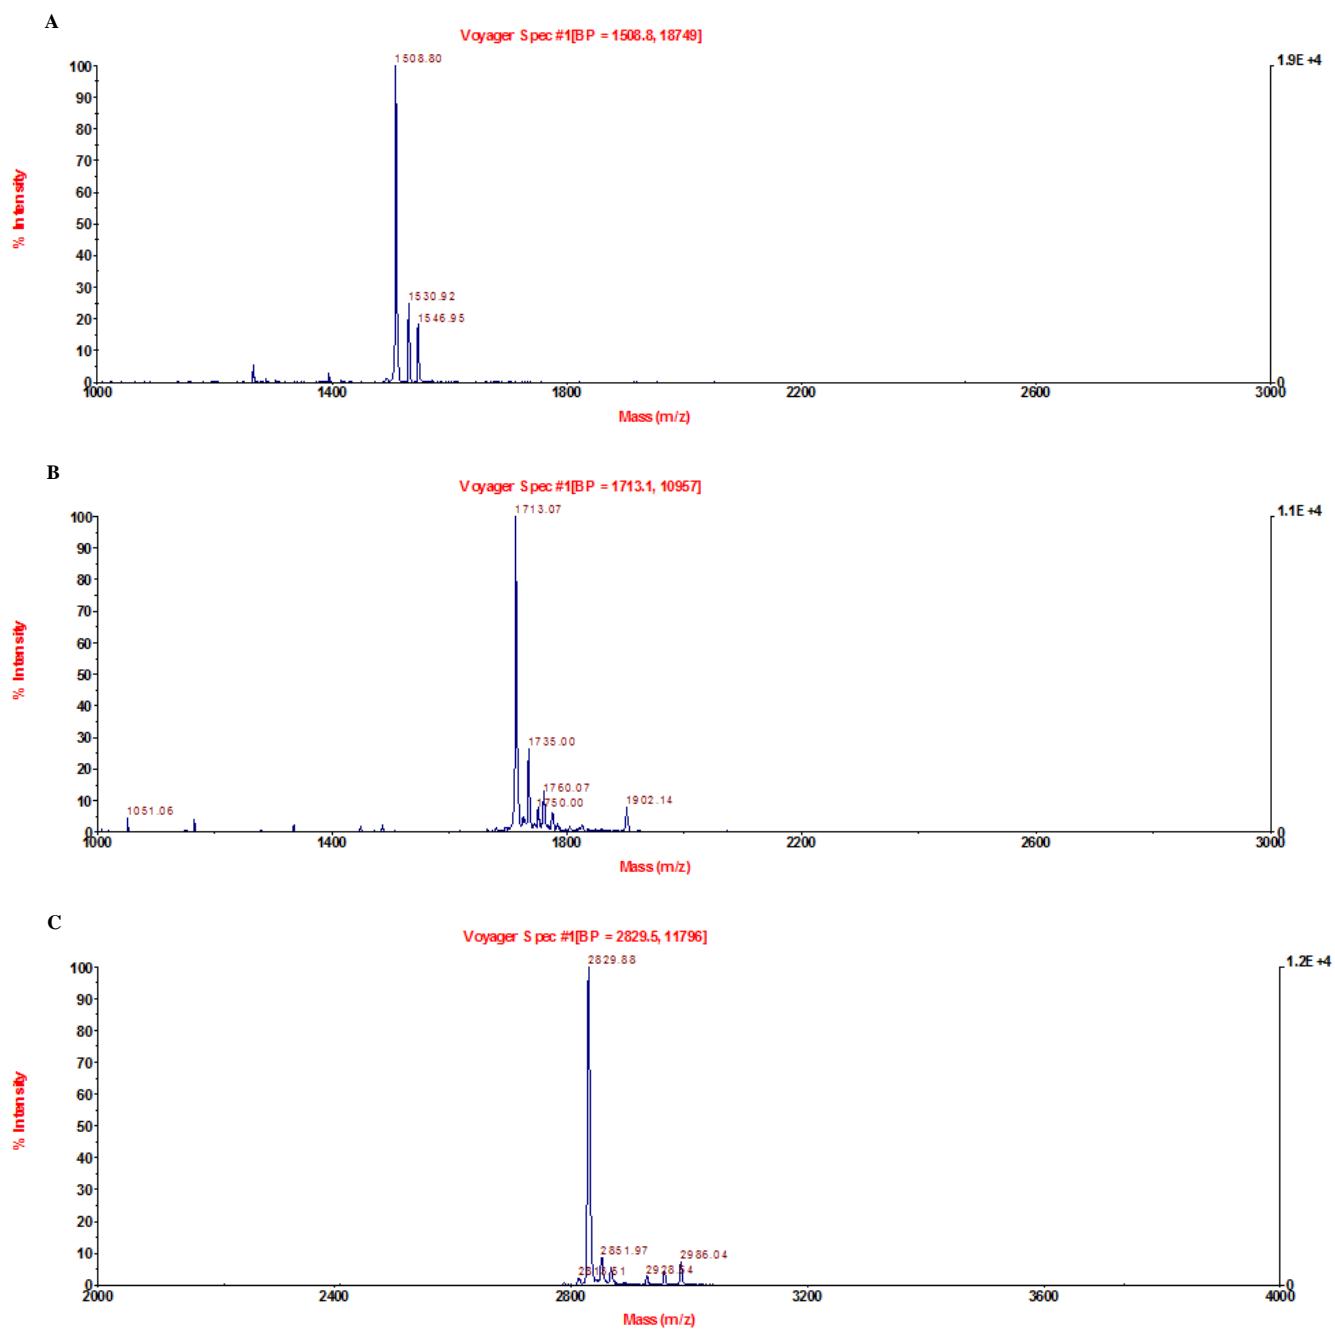

**Figure S1.** MALDI-TOF mass spectrum of chemical synthesis (A) MP-C ( $1508.80 (M + H)^+$ ,  $1530.92 (M + Na)^+$  adduct,  $1546.95 (M + K)^+$  adduct), (B) cMP-C ( $1713.07 (M + H)^+$ ,  $1735.00 (M + Na)^+$  adduct,  $1760.07 (M + K)^+$  adduct), (C) tMP-C ( $2829.88 (M + H)^+$ ).

**Table S1.** Two-way ANOVA analysis of membrane permeabilisation of the Gram-positive bacteria as indicated by an increase in the fluorescence of SYTOX Green after 2 h of incubation with MP-C, cMP-C and tMP-C at 1-, 2- and 4-fold concentrations of their MICs against *S. aureus*. \* p<0.05; \*\* p<0.01; \*\*\* p<0.001 and \*\*\*\* p<0.0001; ns: no significance.

| Tukey's multiple comparisons test     | Mean Diff. | 95% CI of diff.  | Summary |
|---------------------------------------|------------|------------------|---------|
| 1-fold MIC:MP-C vs. 1-fold MIC:cMP-C  | -105.6     | -111.7 to -99.43 | ****    |
| 1-fold MIC:MP-C vs. 1-fold MIC:tMP-C  | -0.5000    | -6.623 to 5.623  | ns      |
| 1-fold MIC:MP-C vs. 2-fold MIC:MP-C   | -62.00     | -68.12 to -55.88 | ****    |
| 1-fold MIC:MP-C vs. 2-fold MIC:cMP-C  | -88.18     | -94.30 to -82.05 | ****    |
| 1-fold MIC:MP-C vs. 2-fold MIC:tMP-C  | -49.35     | -55.47 to -43.23 | ****    |
| 1-fold MIC:MP-C vs. 4-fold MIC:MP-C   | -104.8     | -110.9 to -98.63 | ****    |
| 1-fold MIC:MP-C vs. 4-fold MIC:cMP-C  | -47.63     | -53.75 to -41.50 | ****    |
| 1-fold MIC:MP-C vs. 4-fold MIC:tMP-C  | -67.25     | -73.37 to -61.13 | ****    |
| 1-fold MIC:cMP-C vs. 1-fold MIC:tMP-C | 105.1      | 98.93 to 111.2   | ****    |
| 1-fold MIC:cMP-C vs. 2-fold MIC:MP-C  | 43.55      | 37.43 to 49.67   | ****    |
| 1-fold MIC:cMP-C vs. 2-fold MIC:cMP-C | 17.38      | 11.25 to 23.50   | ****    |
| 1-fold MIC:cMP-C vs. 2-fold MIC:tMP-C | 56.20      | 50.08 to 62.32   | ****    |
| 1-fold MIC:cMP-C vs. 4-fold MIC:MP-C  | 0.8000     | -5.323 to 6.923  | ns      |
| 1-fold MIC:cMP-C vs. 4-fold MIC:cMP-C | 57.93      | 51.80 to 64.05   | ****    |
| 1-fold MIC:cMP-C vs. 4-fold MIC:tMP-C | 38.30      | 32.18 to 44.42   | ****    |
| 1-fold MIC:tMP-C vs. 2-fold MIC:MP-C  | -61.50     | -67.62 to -55.38 | ****    |
| 1-fold MIC:tMP-C vs. 2-fold MIC:cMP-C | -87.68     | -93.80 to -81.55 | ****    |
| 1-fold MIC:tMP-C vs. 2-fold MIC:tMP-C | -48.85     | -54.97 to -42.73 | ****    |
| 1-fold MIC:tMP-C vs. 4-fold MIC:MP-C  | -104.3     | -110.4 to -98.13 | ****    |
| 1-fold MIC:tMP-C vs. 4-fold MIC:cMP-C | -47.13     | -53.25 to -41.00 | ****    |
| 1-fold MIC:tMP-C vs. 4-fold MIC:tMP-C | -66.75     | -72.87 to -60.63 | ****    |
| 2-fold MIC:MP-C vs. 2-fold MIC:cMP-C  | -26.18     | -32.30 to -20.05 | ****    |
| 2-fold MIC:MP-C vs. 2-fold MIC:tMP-C  | 12.65      | 6.527 to 18.77   | ****    |
| 2-fold MIC:MP-C vs. 4-fold MIC:MP-C   | -42.75     | -48.87 to -36.63 | ****    |
| 2-fold MIC:MP-C vs. 4-fold MIC:cMP-C  | 14.38      | 8.252 to 20.50   | ****    |
| 2-fold MIC:MP-C vs. 4-fold MIC:tMP-C  | -5.250     | -11.37 to 0.8726 | ns      |
| 2-fold MIC:cMP-C vs. 2-fold MIC:tMP-C | 38.83      | 32.70 to 44.95   | ****    |
| 2-fold MIC:cMP-C vs. 4-fold MIC:MP-C  | -16.58     | -22.70 to -10.45 | ****    |
| 2-fold MIC:cMP-C vs. 4-fold MIC:cMP-C | 40.55      | 34.43 to 46.67   | ****    |
| 2-fold MIC:cMP-C vs. 4-fold MIC:tMP-C | 20.93      | 14.80 to 27.05   | ****    |
| 2-fold MIC:tMP-C vs. 4-fold MIC:MP-C  | -55.40     | -61.52 to -49.28 | ****    |
| 2-fold MIC:tMP-C vs. 4-fold MIC:cMP-C | 1.725      | -4.398 to 7.848  | ns      |
| 2-fold MIC:tMP-C vs. 4-fold MIC:tMP-C | -17.90     | -24.02 to -11.78 | ****    |
| 4-fold MIC:MP-C vs. 4-fold MIC:cMP-C  | 57.13      | 51.00 to 63.25   | ****    |
| 4-fold MIC:MP-C vs. 4-fold MIC:tMP-C  | 37.50      | 31.38 to 43.62   | ****    |
| 4-fold MIC:cMP-C vs. 4-fold MIC:tMP-C | -19.63     | -25.75 to -13.50 | ****    |

**Table S2.** One-way ANOVA analysis of the effect on cell proliferation of MP-C, cMP-C and tMP-C on the cancer cell lines H157, MDA-MB-435S, PC-3, U251MG, and MCF-7 as well as HMEC-1. \* p<0.05; \*\* p<0.01; \*\*\* p<0.001 and \*\*\*\* p<0.0001; ns: no significance.

| Tukey's multiple comparisons test | H157 | MDB-MB-435S | PC-3 | U251-MG | MCF-7 | HMEC-1 |
|-----------------------------------|------|-------------|------|---------|-------|--------|
| <b>Log peptide (M) = -4.</b>      |      |             |      |         |       |        |
| MP-C vs. cMP-C                    | ns   | ns          | ns   | ns      | ns    | ns     |
| MP-C vs. tMP-C                    | ns   | ns          | ns   | ns      | ns    | ns     |
| cMP-C vs. tMP-C                   | ns   | ns          | ns   | ns      | ns    | ns     |
| <b>Log peptide (M) = -5.</b>      |      |             |      |         |       |        |
| MP-C vs. cMP-C                    | **** | ****        | ***  | ****    | ****  | ns     |
| MP-C vs. tMP-C                    | **** | ****        | **** | ****    | ****  | ****   |
| cMP-C vs. tMP-C                   | **** | ****        | **** | ****    | ****  | ****   |
| <b>Log peptide (M) = -6.</b>      |      |             |      |         |       |        |
| MP-C vs. cMP-C                    | ns   | ns          | **** | ***     | ns    | ns     |
| MP-C vs. tMP-C                    | ns   | ns          | *    | ***     | *     | ns     |
| cMP-C vs. tMP-C                   | *    | *           | **   | ns      | ns    | ns     |
| <b>Log peptide (M) = -7.</b>      |      |             |      |         |       |        |
| MP-C vs. cMP-C                    | ns   | ns          | ns   | ns      | ****  | ns     |
| MP-C vs. tMP-C                    | ns   | ns          | **   | ***     | *     | ns     |
| cMP-C vs. tMP-C                   | ns   | ns          | ns   | *       | ns    | ns     |
| <b>Log peptide (M) = -8.</b>      |      |             |      |         |       |        |
| MP-C vs. cMP-C                    | **   | ns          | ns   | ****    | ns    | ns     |
| MP-C vs. tMP-C                    | ns   | ns          | **   | ****    | ns    | ns     |
| cMP-C vs. tMP-C                   | ***  | ns          | ns   | ns      | ns    | ns     |
| <b>Log peptide (M) = -9.</b>      |      |             |      |         |       |        |
| MP-C vs. cMP-C                    | *    | ns          | ns   | ns      | ns    | ns     |
| MP-C vs. tMP-C                    | *    | ns          | ns   | *       | ns    | ns     |
| cMP-C vs. tMP-C                   | ns   | ns          | ns   | ns      | ns    | ns     |

**Table S3.** One-way ANOVA analysis of the haemolytic activity of MP-C, cMP-C and tMP-C against horse red blood cells. \* p<0.05; \*\* p<0.01; \*\*\* p<0.001 and \*\*\*\* p<0.0001; ns: no significance.

| <b>Tukey's multiple comparisons test</b> | <b>Summary</b> |
|------------------------------------------|----------------|
| <b>512µM</b>                             |                |
| <b>MP-C vs. cMP-C</b>                    | ***            |
| <b>MP-C vs. tMP-C</b>                    | ns             |
| <b>cMP-C vs. tMP-C</b>                   | ns             |
| <b>256µM</b>                             |                |
| <b>MP-C vs. cMP-C</b>                    | ***            |
| <b>MP-C vs. tMP-C</b>                    | ns             |
| <b>cMP-C vs. tMP-C</b>                   | ***            |
| <b>128µM</b>                             |                |
| <b>MP-C vs. cMP-C</b>                    | ****           |
| <b>MP-C vs. tMP-C</b>                    | ****           |
| <b>cMP-C vs. tMP-C</b>                   | ****           |
| <b>64µM</b>                              |                |
| <b>MP-C vs. cMP-C</b>                    | ****           |
| <b>MP-C vs. tMP-C</b>                    | ****           |
| <b>cMP-C vs. tMP-C</b>                   | ****           |
| <b>32µM</b>                              |                |
| <b>MP-C vs. cMP-C</b>                    | ****           |
| <b>MP-C vs. tMP-C</b>                    | ***            |
| <b>cMP-C vs. tMP-C</b>                   | ****           |
| <b>16µM</b>                              |                |
| <b>MP-C vs. cMP-C</b>                    | ****           |
| <b>MP-C vs. tMP-C</b>                    | **             |
| <b>cMP-C vs. tMP-C</b>                   | ****           |
| <b>8µM</b>                               |                |
| <b>MP-C vs. cMP-C</b>                    | ****           |
| <b>MP-C vs. tMP-C</b>                    | **             |
| <b>cMP-C vs. tMP-C</b>                   | ****           |
| <b>4µM</b>                               |                |
| <b>MP-C vs. cMP-C</b>                    | ****           |
| <b>MP-C vs. tMP-C</b>                    | ns             |
| <b>cMP-C vs. tMP-C</b>                   | ****           |
| <b>2µM</b>                               |                |
| <b>MP-C vs. cMP-C</b>                    | ****           |
| <b>MP-C vs. tMP-C</b>                    | ns             |
| <b>cMP-C vs. tMP-C</b>                   | ****           |
| <b>1µM</b>                               |                |
| <b>MP-C vs. cMP-C</b>                    | *              |
| <b>MP-C vs. tMP-C</b>                    | ns             |
| <b>cMP-C vs. tMP-C</b>                   | ns             |
